# Supplementary material for: Room-temperature silver-containing liquid metal salts with nitrate anions
Source: Royal Society of Chemistry journal article supplement (doi:10.1039/c3cp53263a), 2013-01-01
Supplement: c3cp53263a.pdf [file c3cp53263a.pdf]

# Room-temperature silver-containing liquid metal salts with nitrate anions - Electronic supporting information

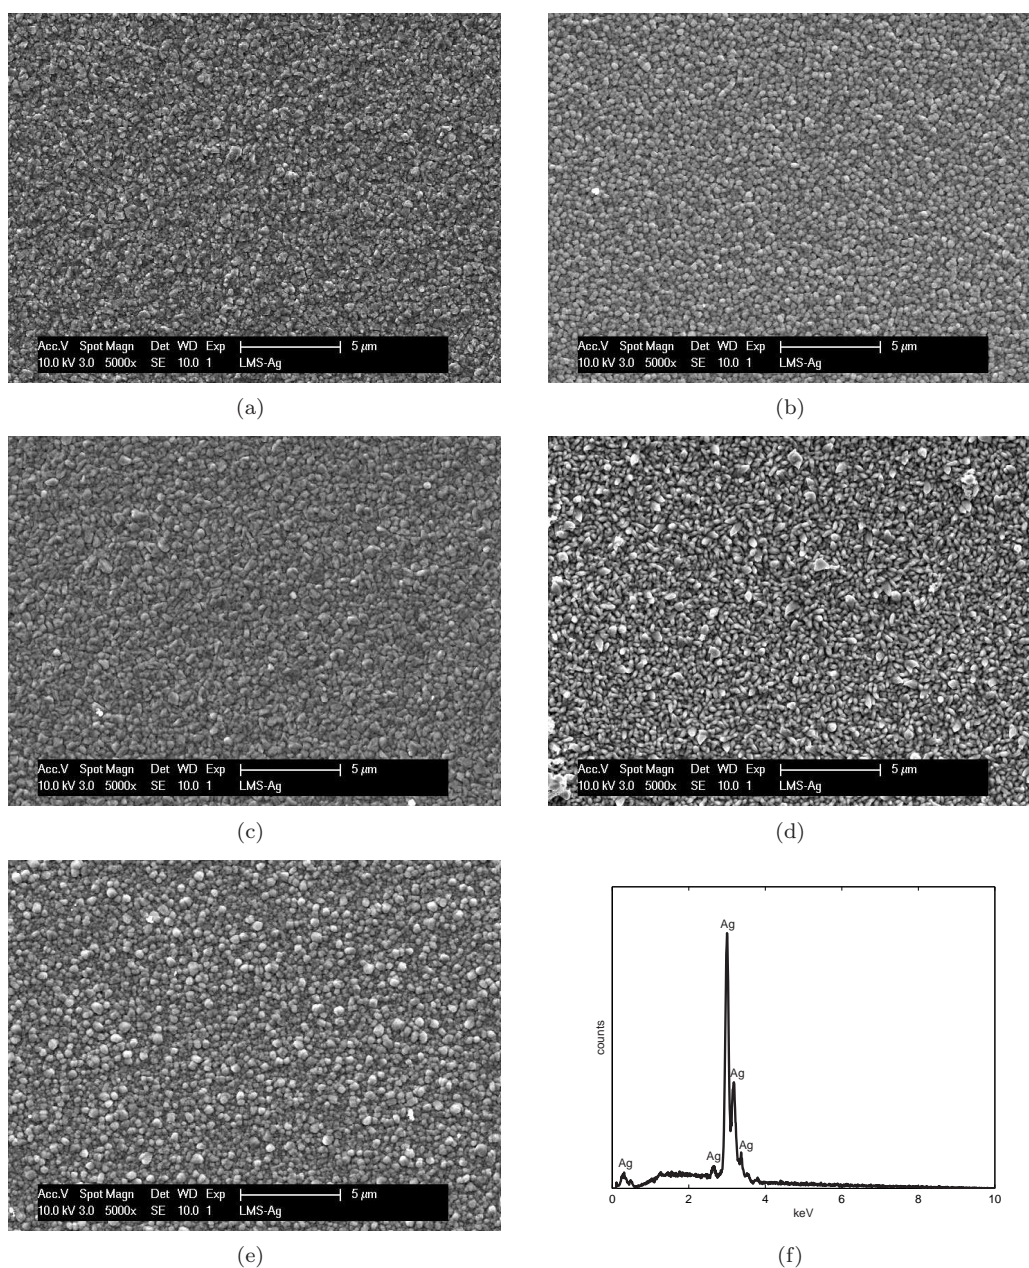

Figure 1: SEM micrographs of silver deposits from [Ag(EtIm)<sub>2</sub>][NO<sub>3</sub>] (a-b), [Ag(MeIm)(EtIm)][NO<sub>3</sub>] (c-d) and [Ag(BuIm)<sub>2</sub>][NO<sub>3</sub>] (e) on a Au working electrode at 90 °C obtained at -1 A dm<sup>-2</sup> (a-c-e) and -5 A dm<sup>-2</sup> (b-d). The theoretical thickness is 1 μm. A typical EDX spectrum is shown in (f).

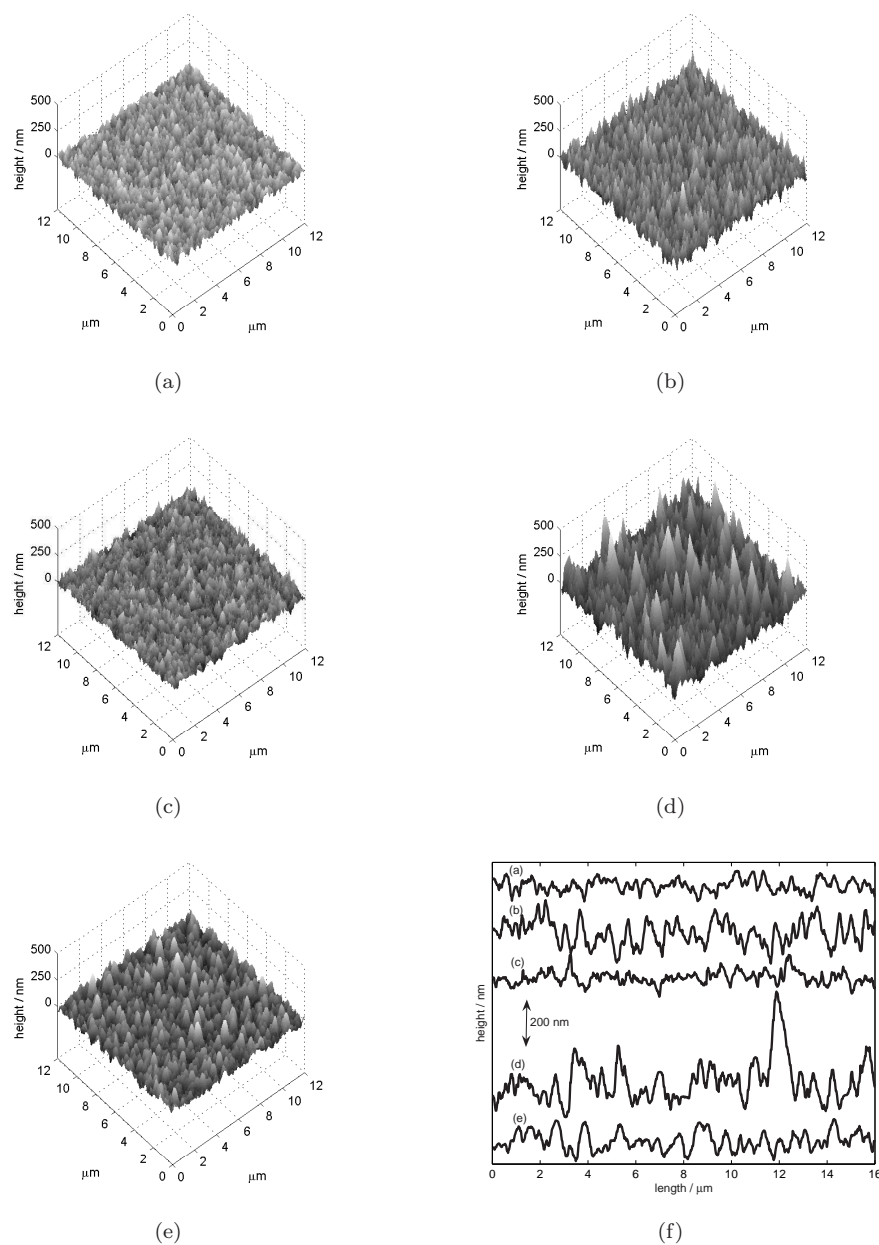

Figure 2: AFM images of silver deposits from  $[\text{Ag}(\text{EtIm})_2][\text{NO}_3]$  (a-b),  $[\text{Ag}(\text{MeIm})(\text{EtIm})][\text{NO}_3]$  (c-d) and  $[\text{Ag}(\text{BuIm})_2][\text{NO}_3]$  (e) on a Au working electrode at 90 °C obtained at  $-1 \text{ A dm}^{-2}$  (a-c-e) and  $-5 \text{ A dm}^{-2}$  (b-d). (f): roughness profiles.
